# Supplementary material for: Dynamics of energy transfer and soft-landing in collisions of protonated dialanine with perfluorinated self-assembled monolayer surfaces
Source: Royal Society of Chemistry journal article supplement (doi:10.1039/c4cp03535f), 2014-01-01

# Dynamics of Energy Transfer and Soft-Landing in Collisions of Protonated Dialanine with Perfluorinated Self-Assembled Monolayer Surfaces

*Subha Pratihar,<sup>a</sup> Dhruv G. Bhakta,<sup>a</sup> Swapnil C. Kohale,<sup>a</sup> Julia Laskin,<sup>b</sup> William L. Hase,<sup>a,\*</sup>*

<sup>a</sup>Department of Chemistry and Biochemistry, Texas Tech University, Lubbock, Texas 79409-1061, USA.

<sup>b</sup>Physical Sciences Division, Pacific Northwest National Laboratory, P.O. Box 999 K8-88

Richland, Washington, 99352, USA

\* To whom correspondence should be addressed: [bill.hase@ttu.edu](mailto:bill.hase@ttu.edu)

## Supporting Information

Comparison of molecular mechanical (MM), *J. Phys. Chem. B* **2002**, *106*, 9912-9922; and MP2/aug-ccpVTZ intermolecular potentials for different CF<sub>4</sub>/CF<sub>4</sub> orientations. Both high and low potential energy scans are shown.

**C-C Orientation**

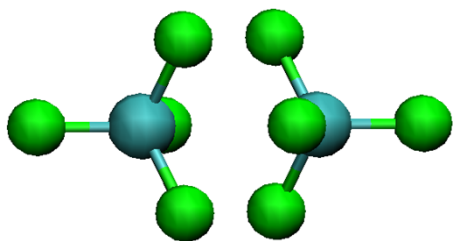

**F-C Orientation**

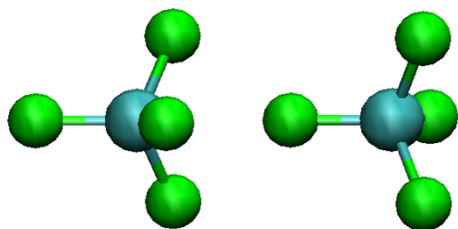

**F-F Orientation**

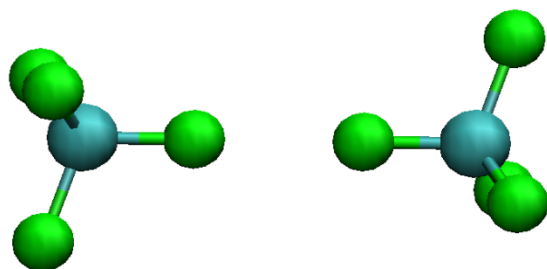

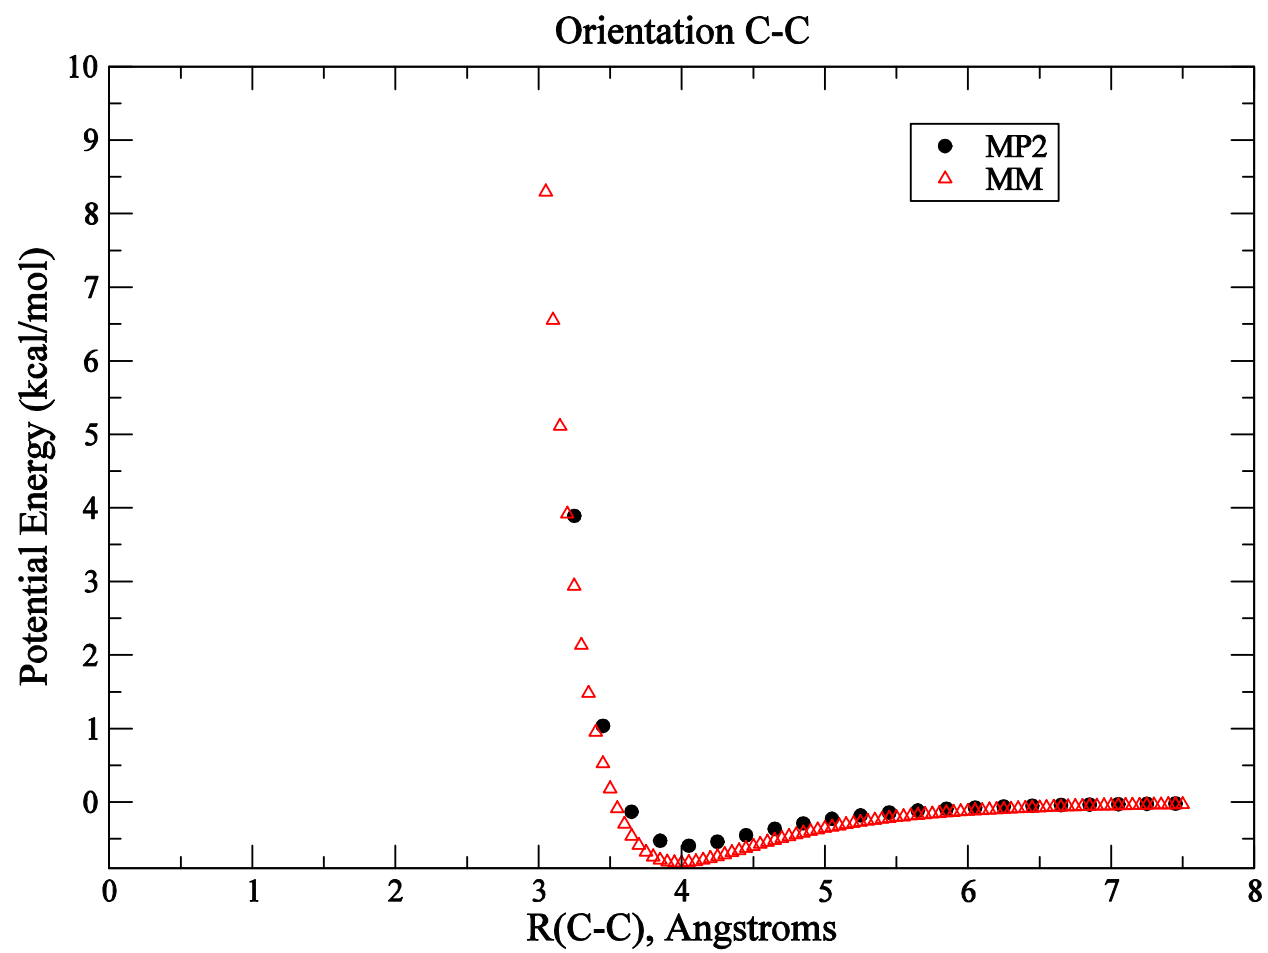

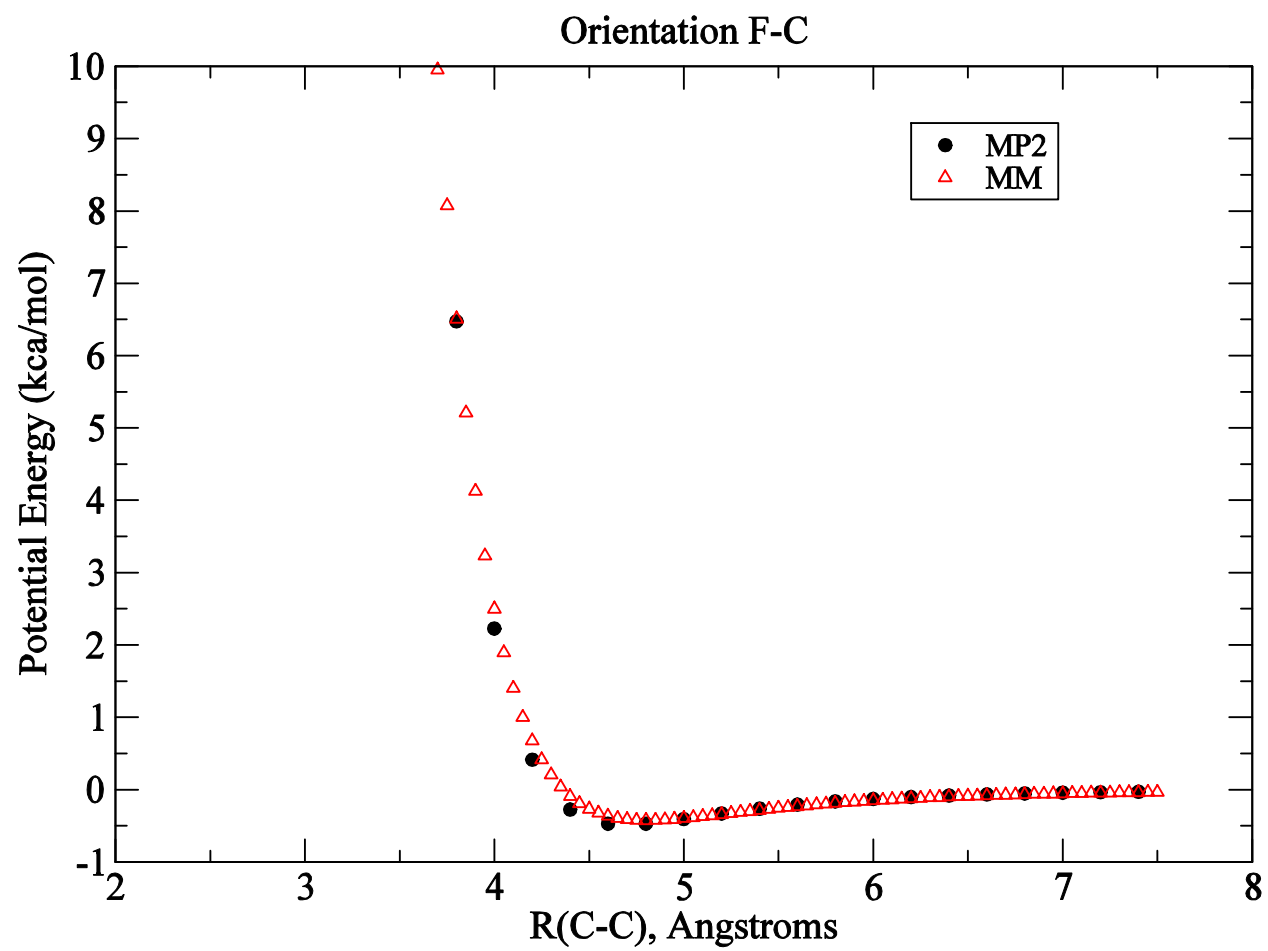

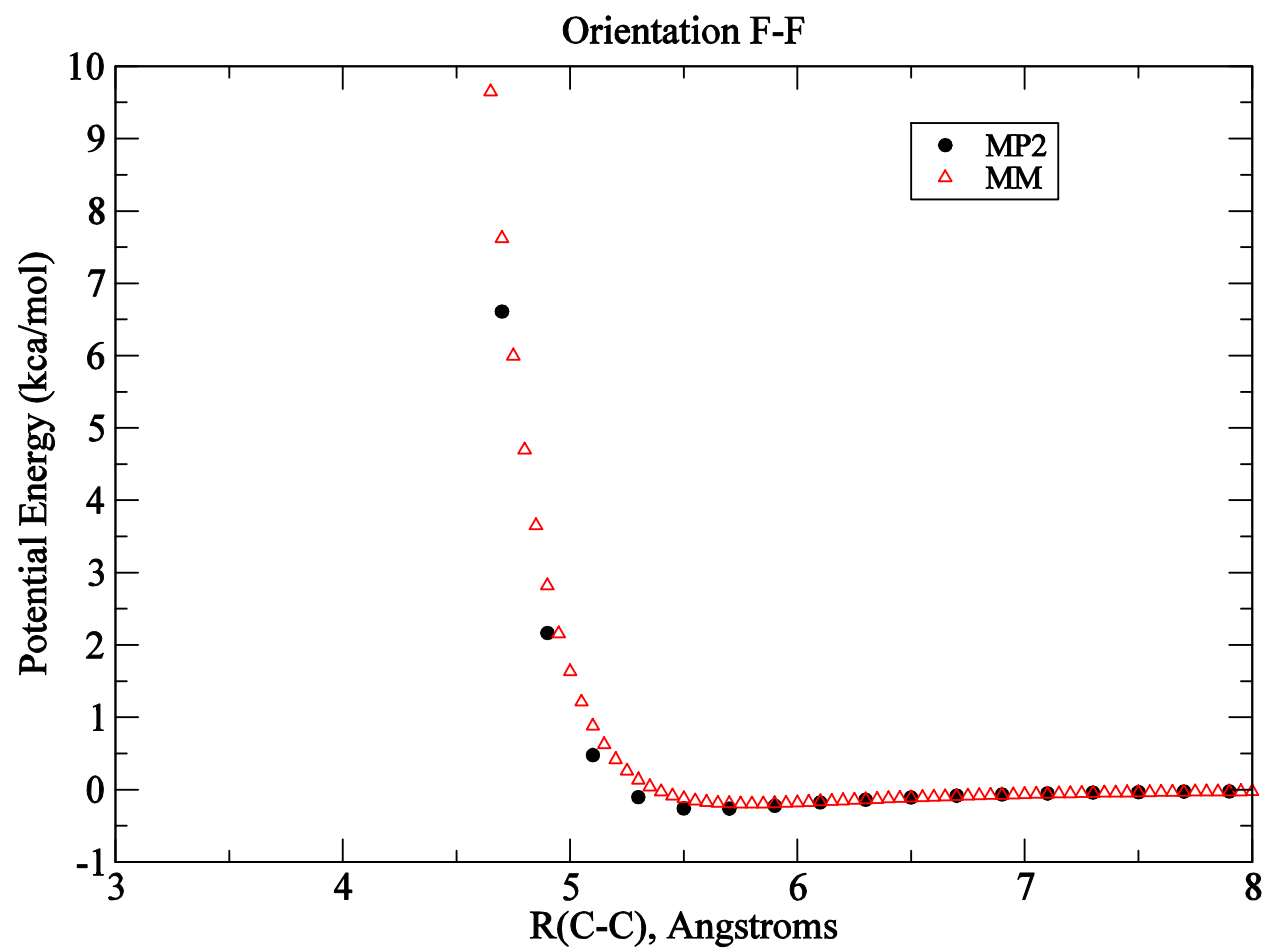

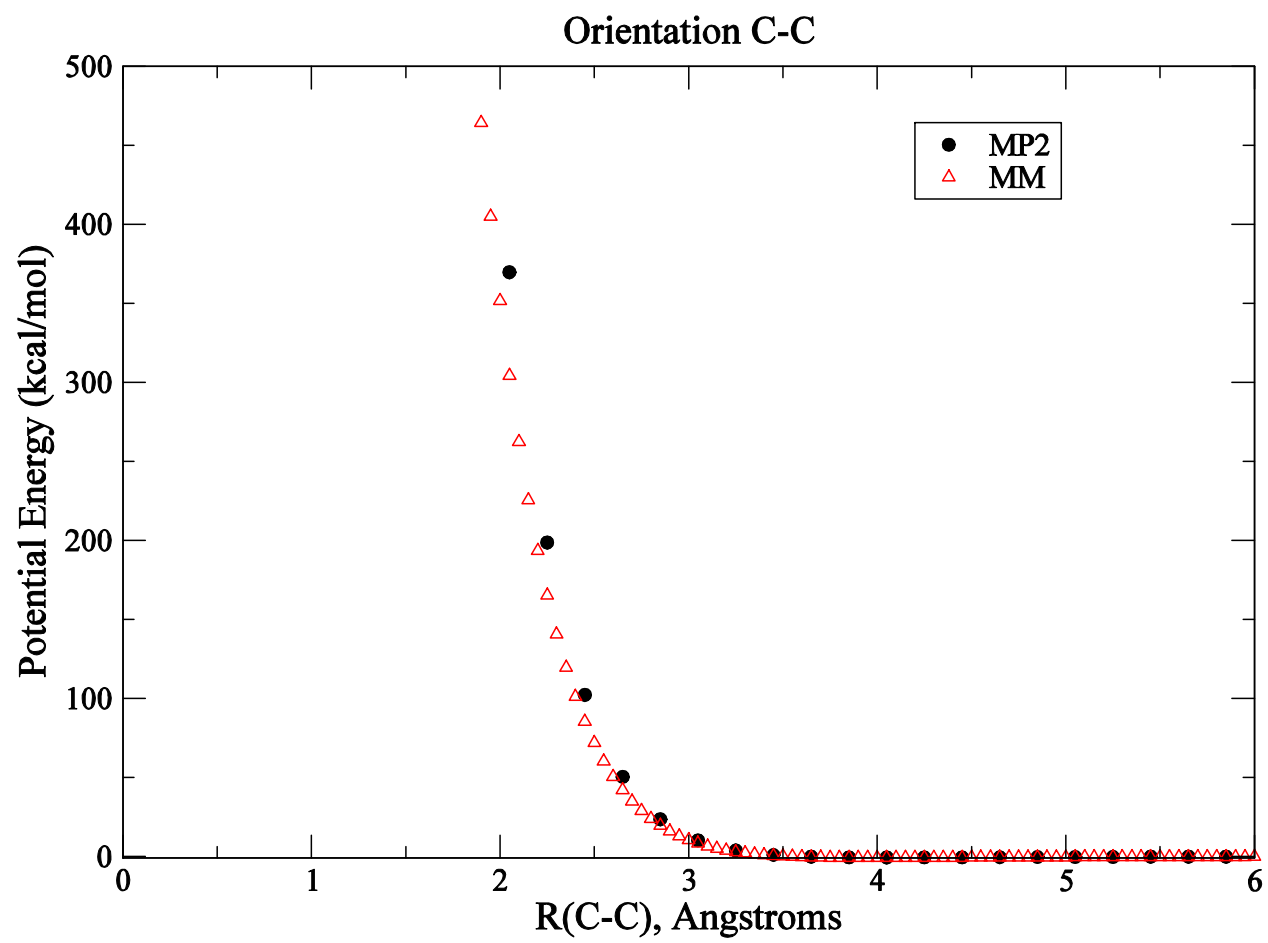

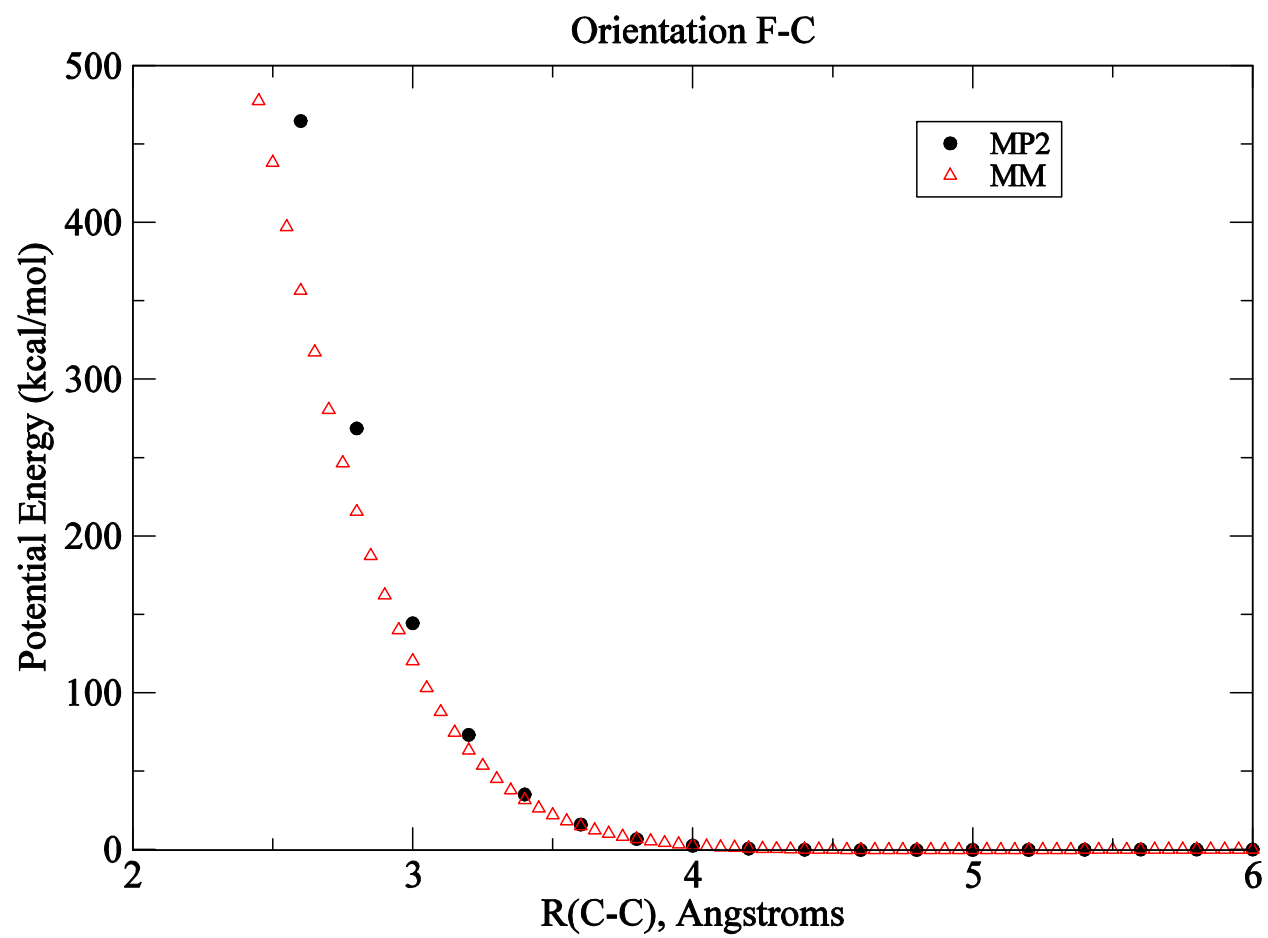



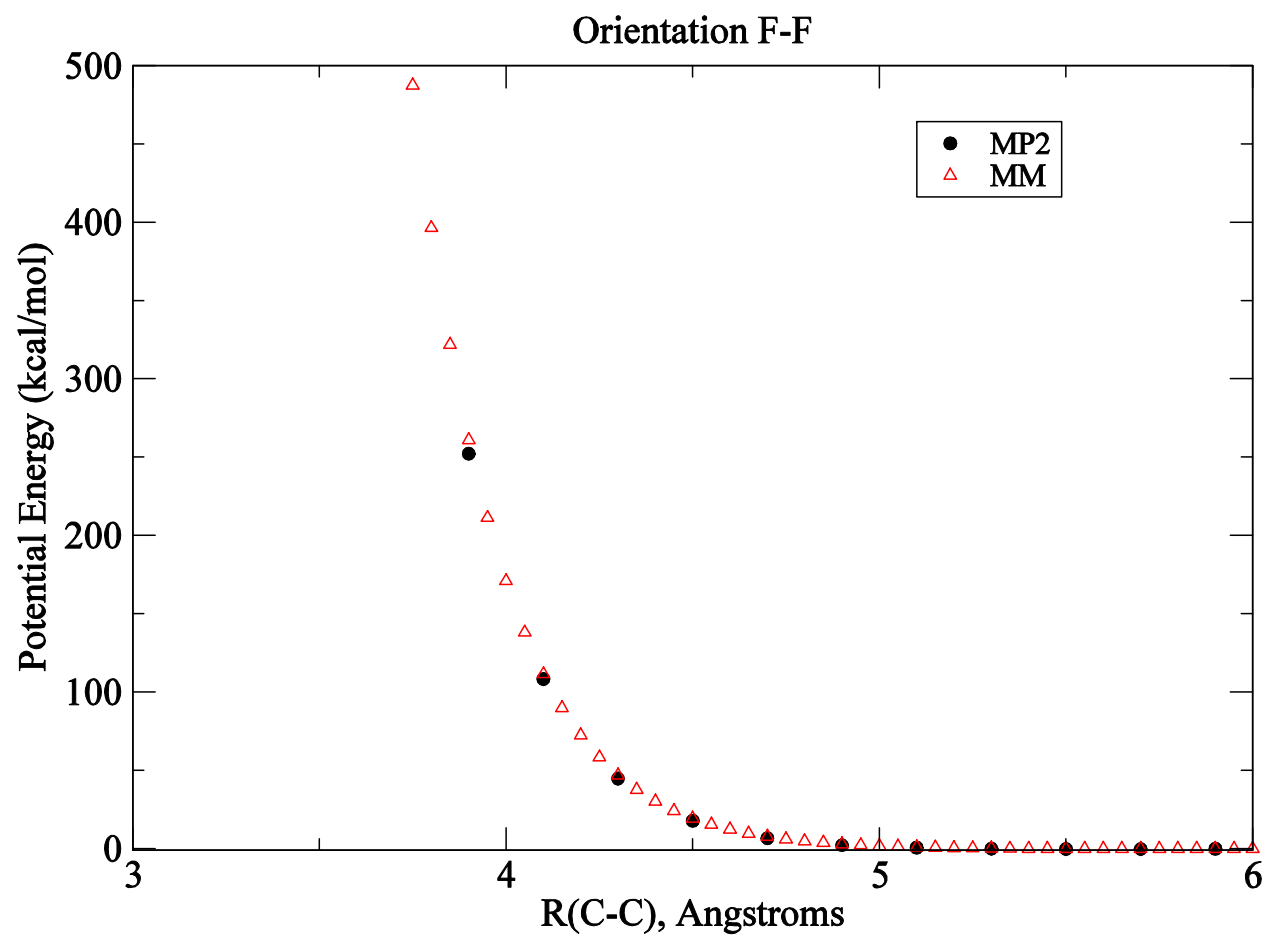

Supplement: c4cp03535f1.pdf [file c4cp03535f1.pdf]
